# Supplementary material for: Rock alteration at the post-Variscan nonconformity: implications for Carboniferous–Permian surface weathering versus burial diagenesis and paleoclimate evaluation
Source: Copernicus journal article supplement (doi:10.5194/se-12-1165-2021), 2021-05-25
Supplement: Supplementary file 1 [file se-12-1165-2021-supplement.zip]

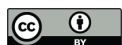

## *Supplement of*

# **Rock alteration at the post-Variscan nonconformity: implications for Carboniferous–Permian surface weathering versus burial diagenesis and paleoclimate evaluation**

**Fei Liang et al.**

*Correspondence to:* Jun Niu ([niu junmm@outlook.com](mailto:niu junmm@outlook.com))

- [se-12-1165-2021-supplement-title-page.pdf](#)
- [Fig. S1.jpg](#)
- [Fig. S2.jpg](#)
- [Table \(S1, S2, S3, S4, S5\).xlsx](#)

The copyright of individual parts of the supplement might differ from the article licence.
